# Supplementary figures and images for: African Swine Fever Virus Ubiquitin-Conjugating Enzyme Is an Immunomodulator Targeting NF-κB Activation
Source: MDPI journal article supplement (doi:10.3390/v13061160), 2021-06-17

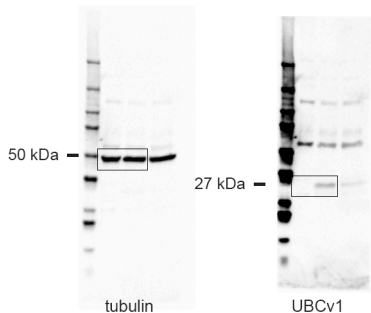

Figure S1. Uncropped full-length pictures of western blotting membranes from Figure 6.

Supplement: s1 [file s1]
